# Supplementary material for: Design and Simulation of Pottery Kiln
Source: Research Square preprint supplement (doi:10.21203/rs.3.rs-593830/v1), 2021-06-15
Supplement: Supplementary file 1 [file a1baeb45aa3d6cf75bcb11ad.docx]

**APPENDIX A**

**MATLAB Code for Air Supply Calculations**

m_wood=500*(1-0.10); %kg dry wood / 4 Hrs MW_wood= (6*12+10+16*5)*1e-3; %kg/mole MW_O2=32e-3; %kg/mole MW_CO2= (12+32)*1e-3; %kg/mole MW_H2O=18e-3; %kg/mole MW_N2=14e-3; %kg/mole

%Calculation of needed air supply

n_wood=m_wood/MW_wood;%moles of wood per batch n_O2=6*n_wood; %moles of O2 required according to C6H10O5 + 6O2 --> 6CO2 + 5H2O m_O2=n_O2*MW_O2; %kg stoichiometric amount of O2 needed for one batch m_CO2=6*n_wood*MW_CO2; %kg from combustion m_H2O=5*n_wood*MW_H2O; %kg from combustion m_air_tot=m_O2/0.231; %kg stoichiometric amount of air needed for one batch m_N2=0.79*m_air_tot ; %kg inert m_xs_air=2*m_air_tot ; %kg 100% excess air m_vapor=500*0.10; %kg the moist in the wood evaporates m_total=m_CO2+m_H2O+m_N2+m_xs_air+m_vapor; %kg per batch m_total_inlet=m_total/(4*3600); %kg/s

**APPENDIX B**

**TABLE B-1 MODELS AND RESULTS OF CHANGE IN THE FIREWALL HEIGHT**

| **Case 1** | **Results** |
| --- | --- |
| Ansys Model 1  **Firewall Height 2 m**  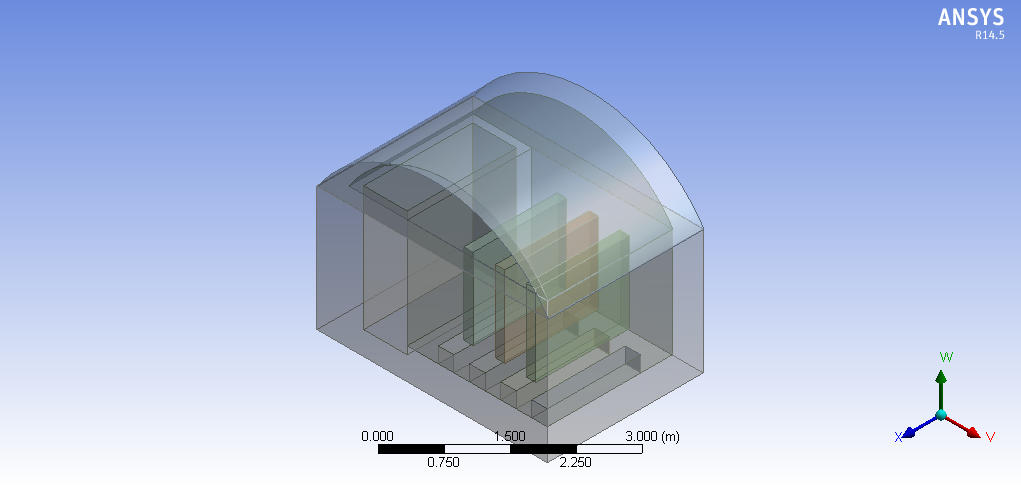 Left Side View  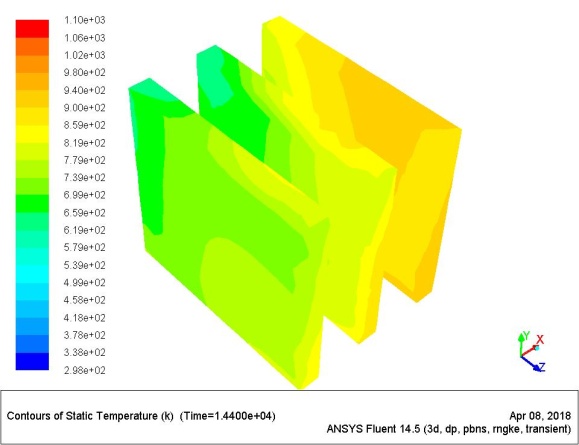 | Static Temperature Profile (K)  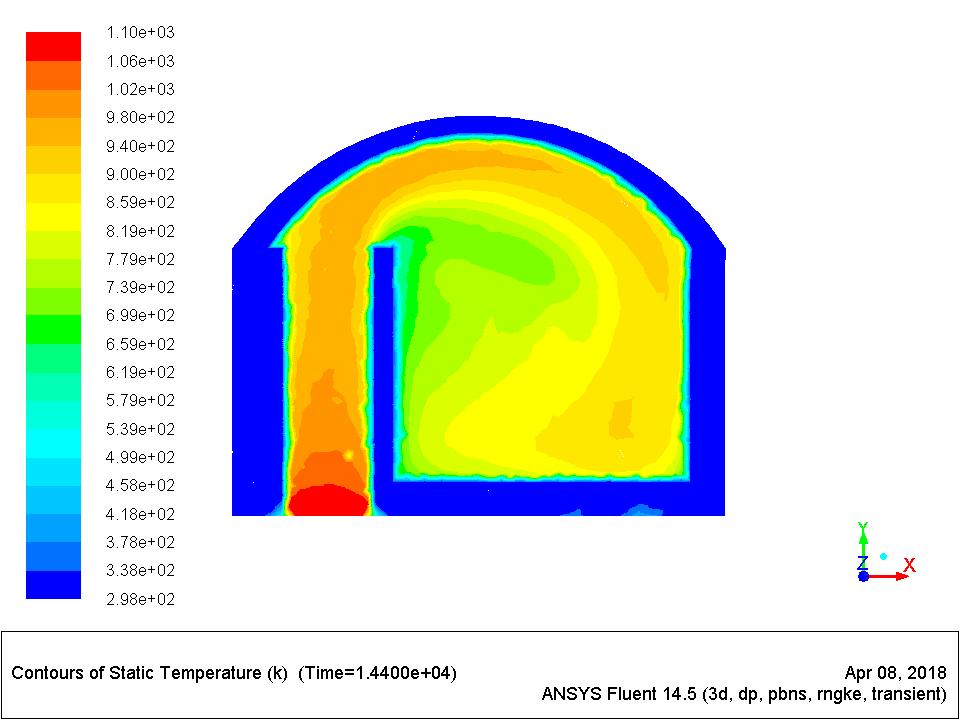Temperature contours on the Surface of wares  Right Side view  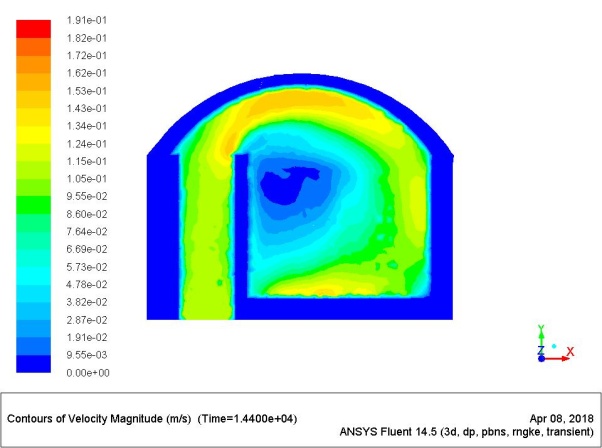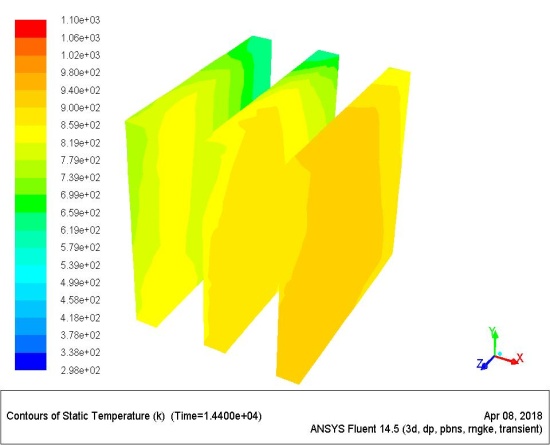  Velocity Profile (m/s) |

**Table B-1** (Continued)

| **Case 2** | **Results** |
| --- | --- |
| Ansys Model Ⅱ  **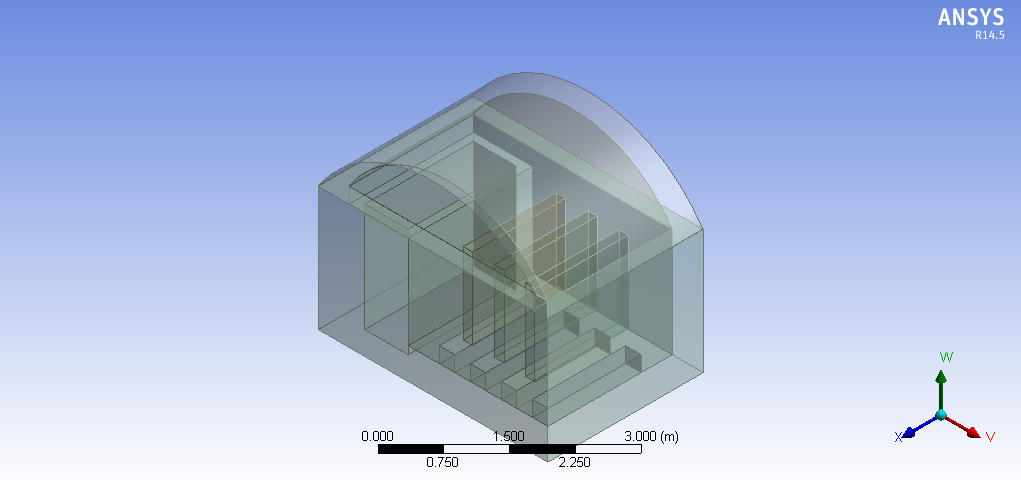Firewall Height 1.75 m**  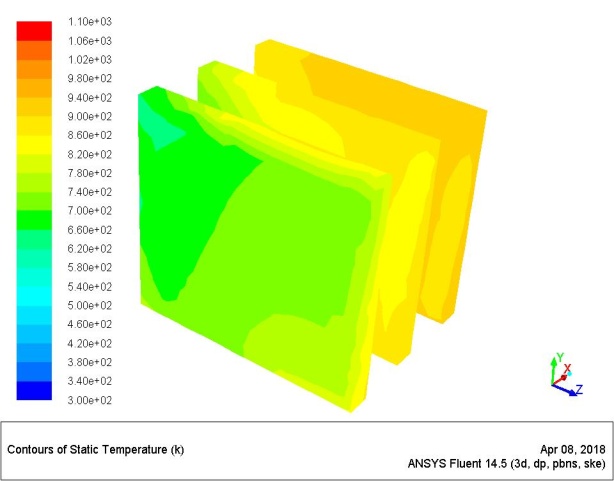  Left Side view | Static Temperature Profile (K)  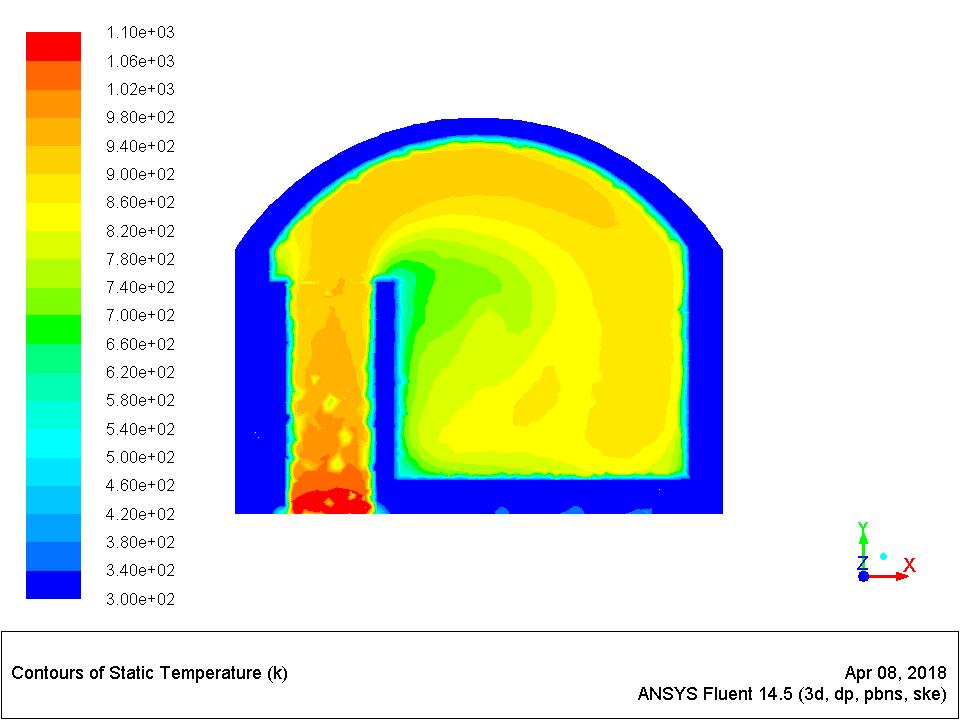  Temperature Contours on the Surface of wares    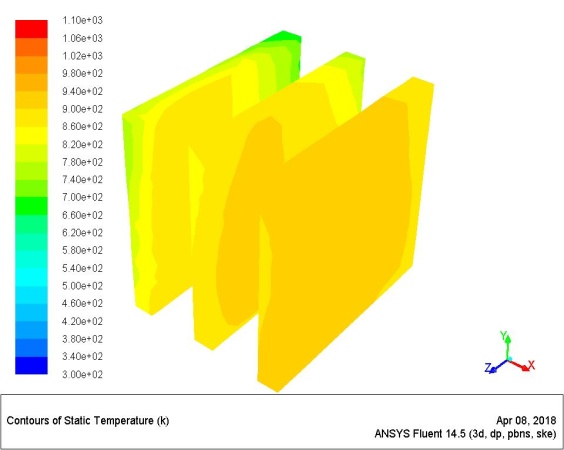 Right Side View  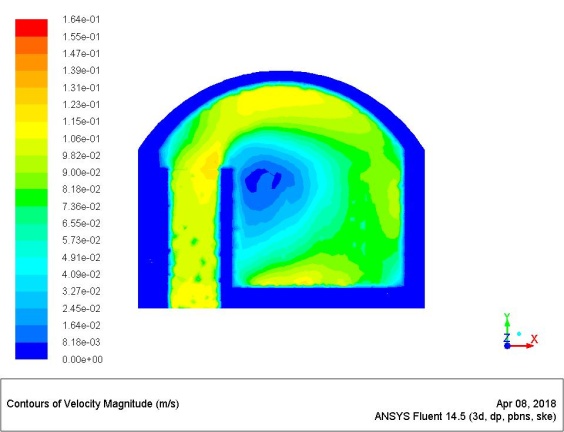Velocity Profile (m/s) |

**Table B-1** (Continued)

| **Case 3** | **Results** |
| --- | --- |
| Ansys Model Ⅲ  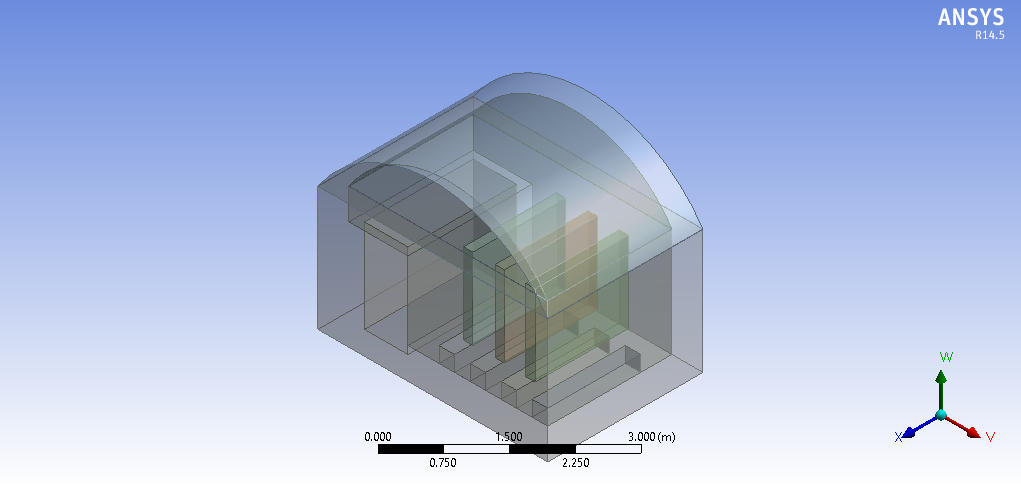  **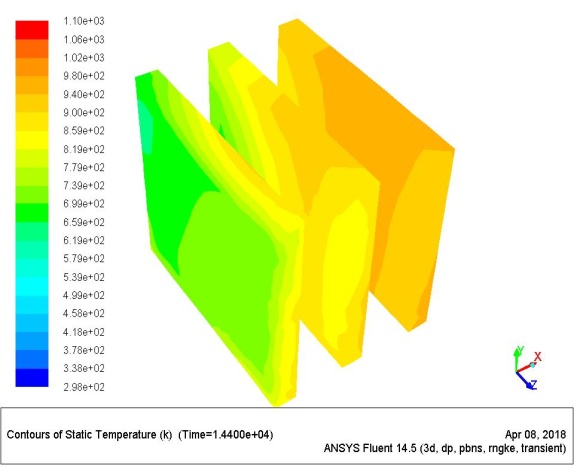 Firewall Height 1.5 m**  Left Side view | 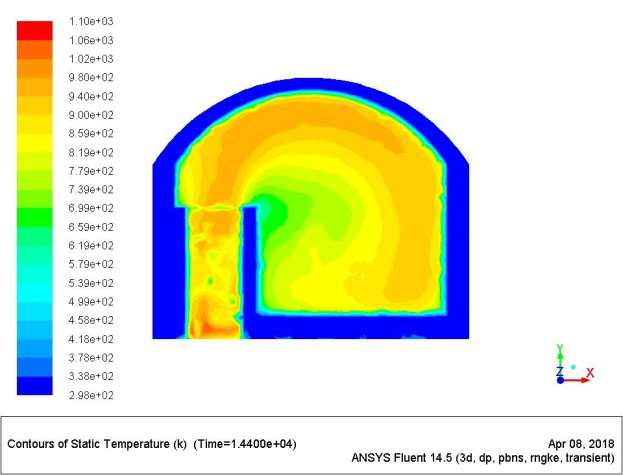Static Temperature Profile (K)  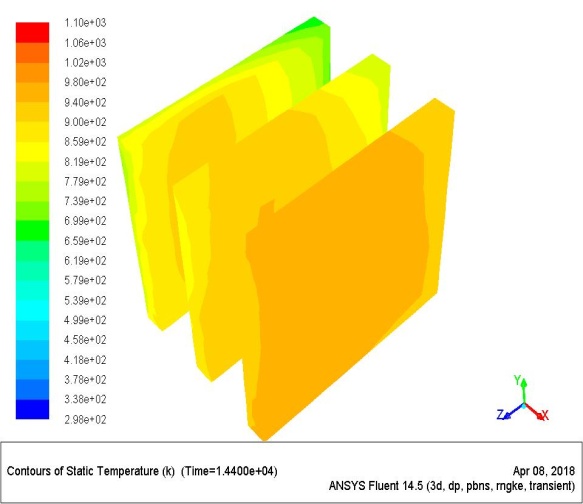Temperature contours on the surface of wares  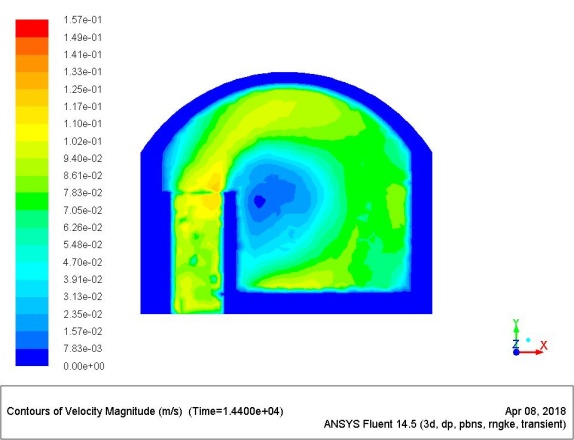 Right Side view  Velocity Profile (m/s) |

**Table B-1** (Continued)

| **Case 4** | **Results** |
| --- | --- |
| 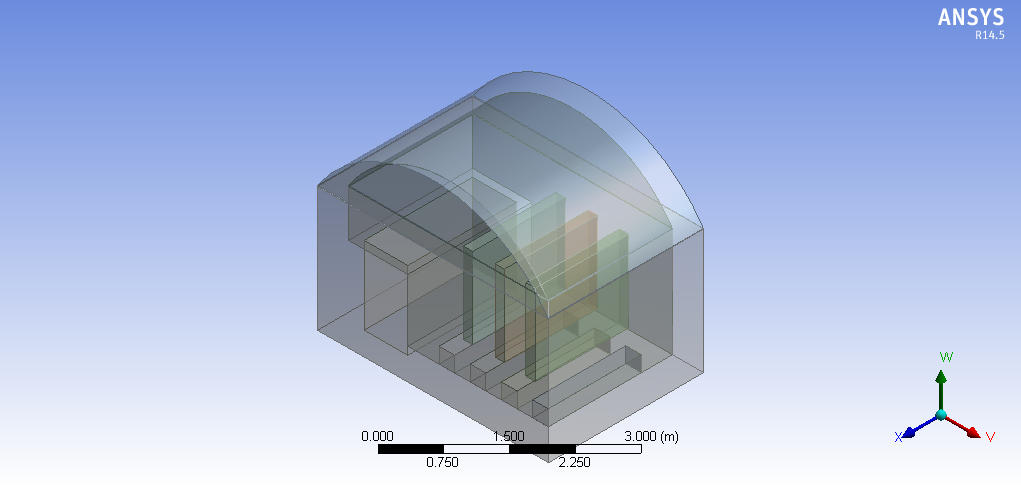Ansys Model Ⅳ  **Firewall Height 1.25 m**    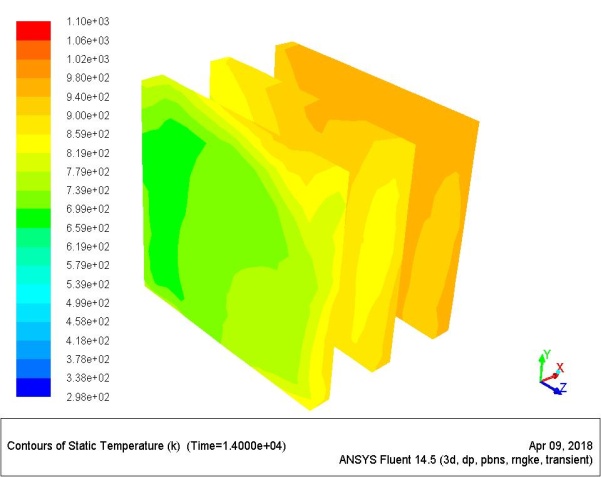 Left Side view | 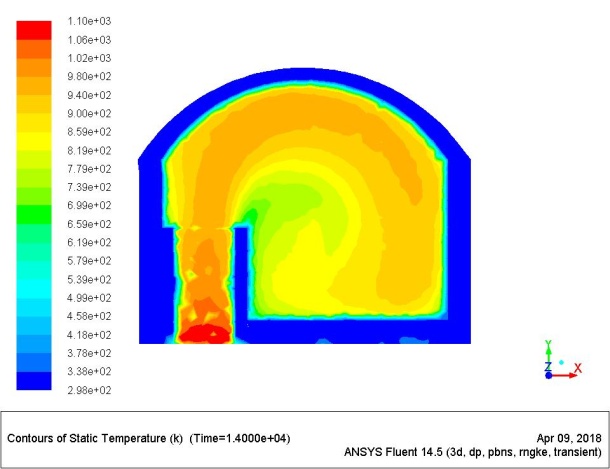Static Temperature Profile (K)  Temperature contours on the surface of wares  Right Side view  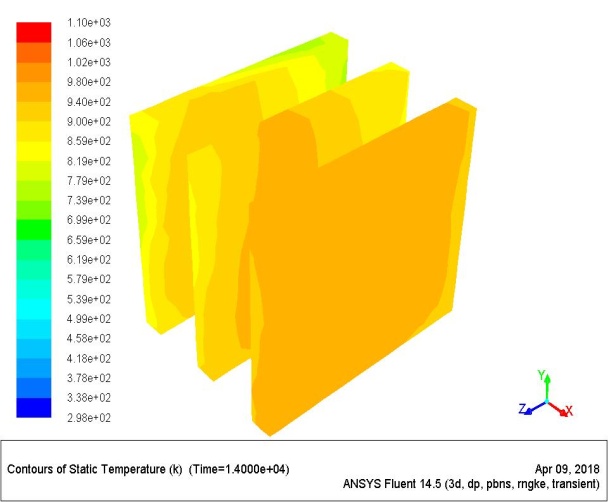  Velocity profile (m/s)  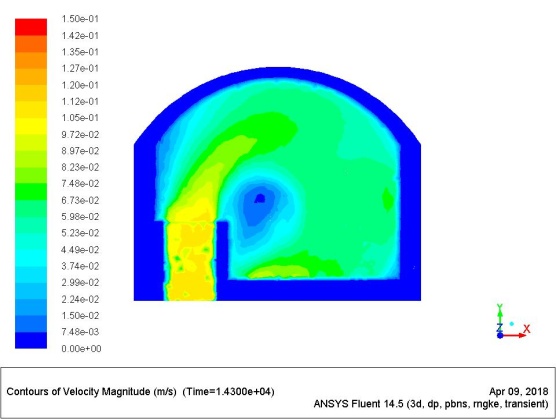 |

**Table B-1** (Continued)

| **Case 5** | **Results** |
| --- | --- |
| **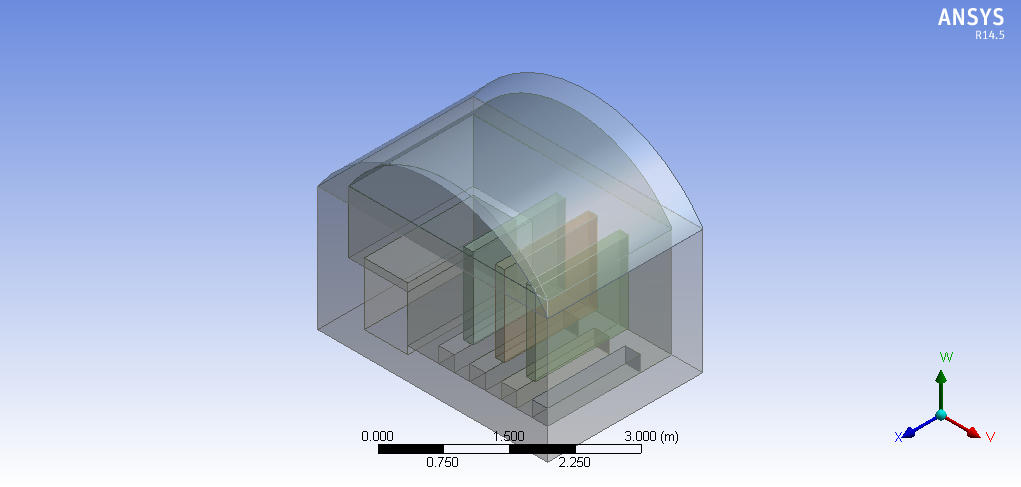**Ansys Model Ⅴ  **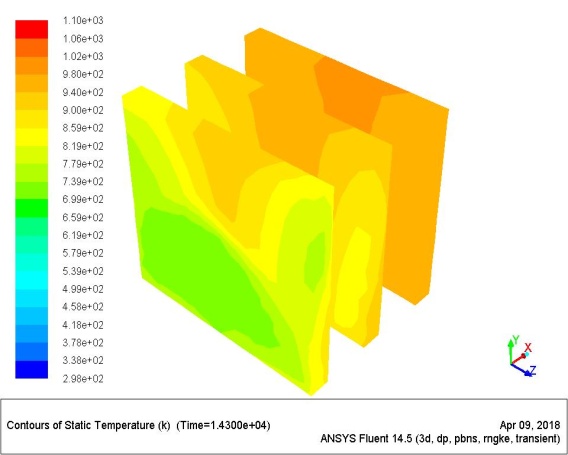Firewall height 1 m**  Left Side view | 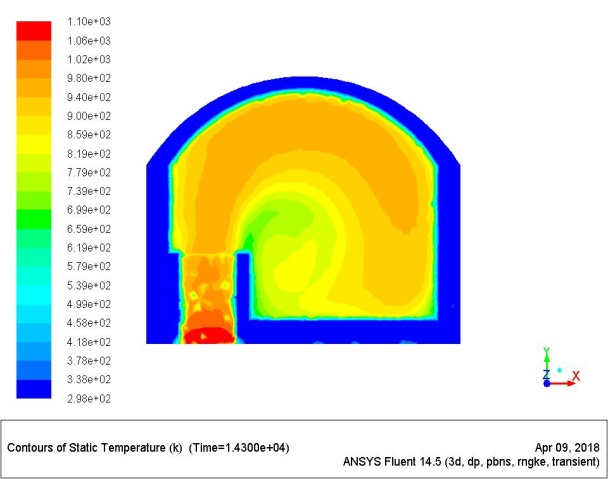Static Temperature profile (K)  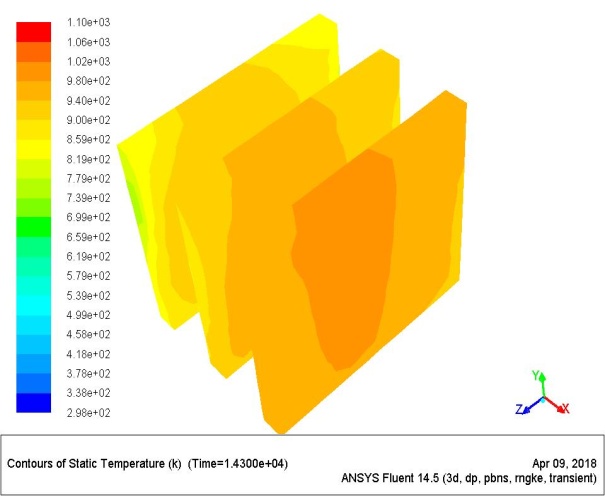Temperature contours on the surface of wares    Right Side view  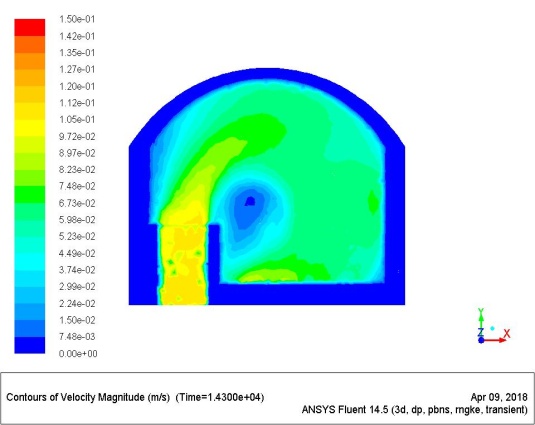 Velocity profile (m/s) |

**Table B-1** (Continued)

| **Case 6** | **Results** |
| --- | --- |
| 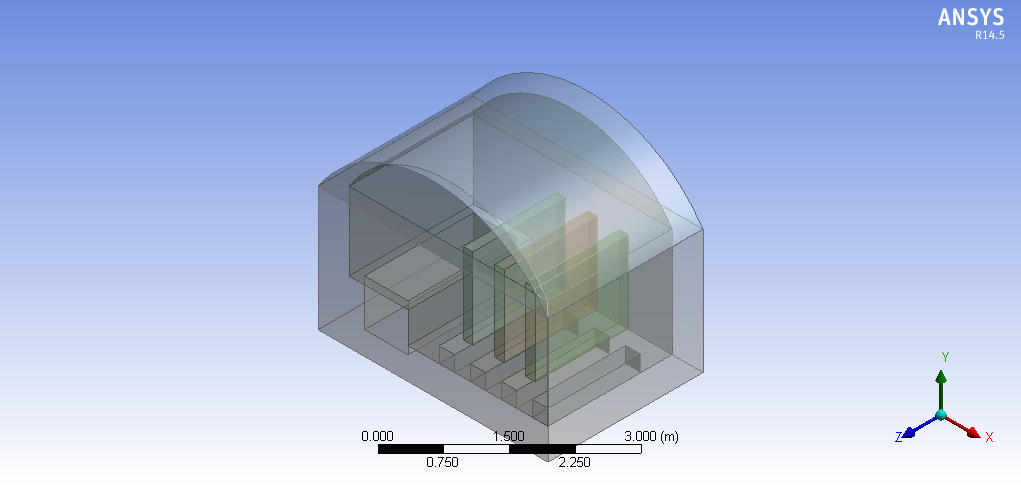Ansys model Ⅵ  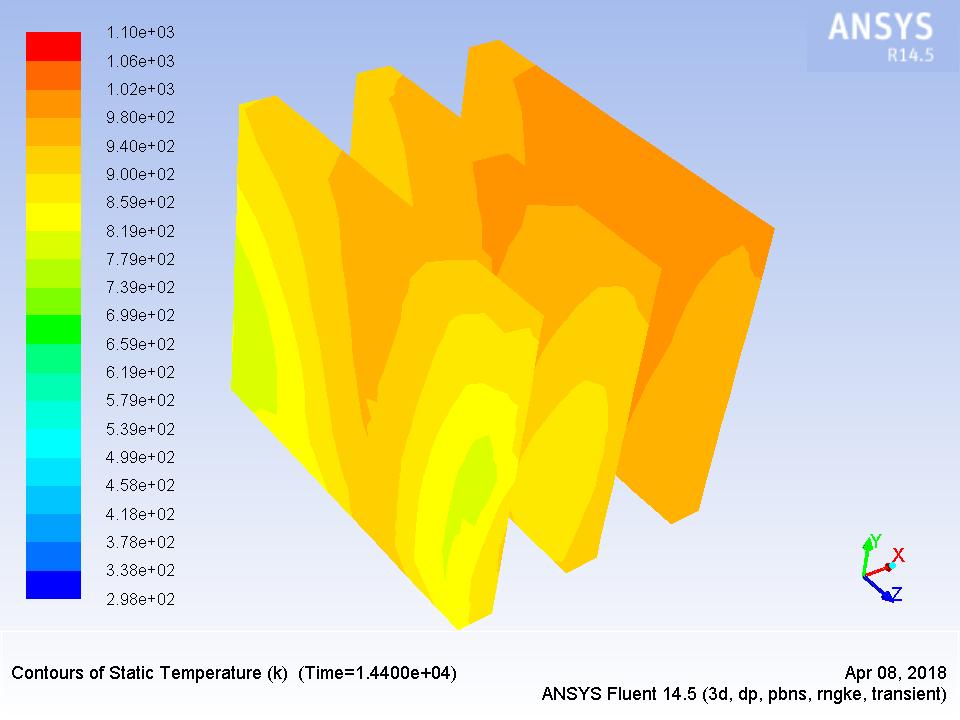 **Firewall height 0.75 m**  Left Side view | 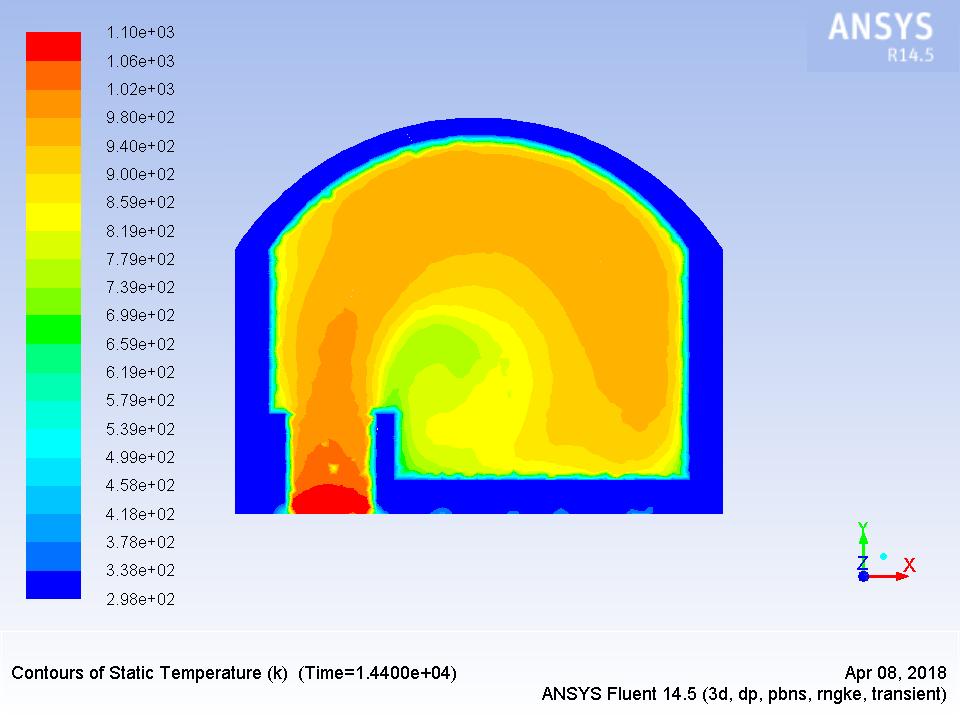Static Temperature profile (K)  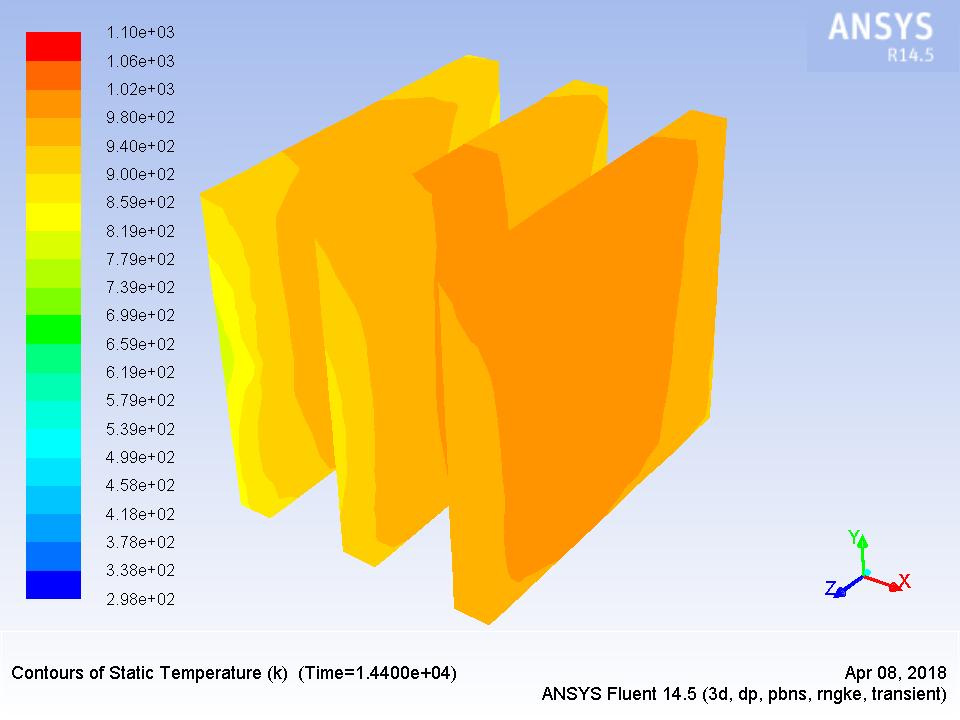  Temperature contours on surface of the wares  Right Side view  Velocity profile (m/s)  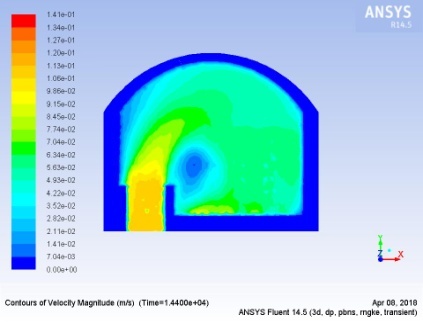 |
